# Supplementary material for: Variations in Glycogen Synthesis in Human Pluripotent Stem Cells with Altered Pluripotent States
Source: PubMed Central journal article supplement (PMC4643957; doi:10.1371/journal.pone.0142554), 2015-11-13
Supplement: pone.0142554.s001.pdf [file pone.0142554.s001.pdf]

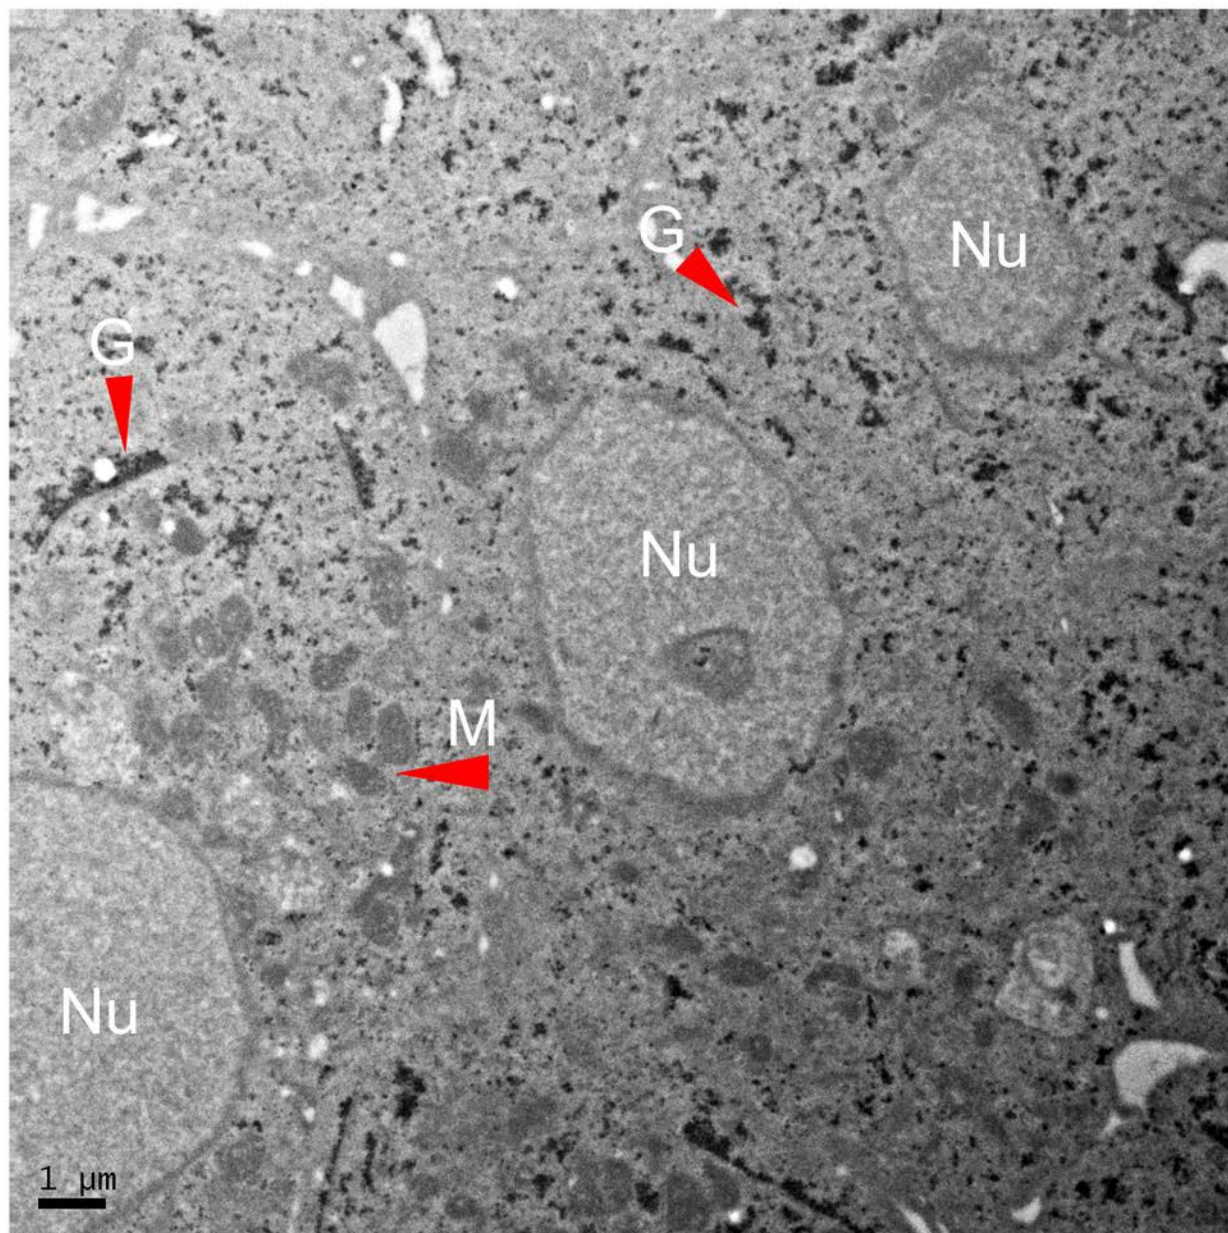

S1 Fig. (A) TEM analysis of glycogen synthesis and the formation of glycogen bodies in untreated H1 hESCs (control)

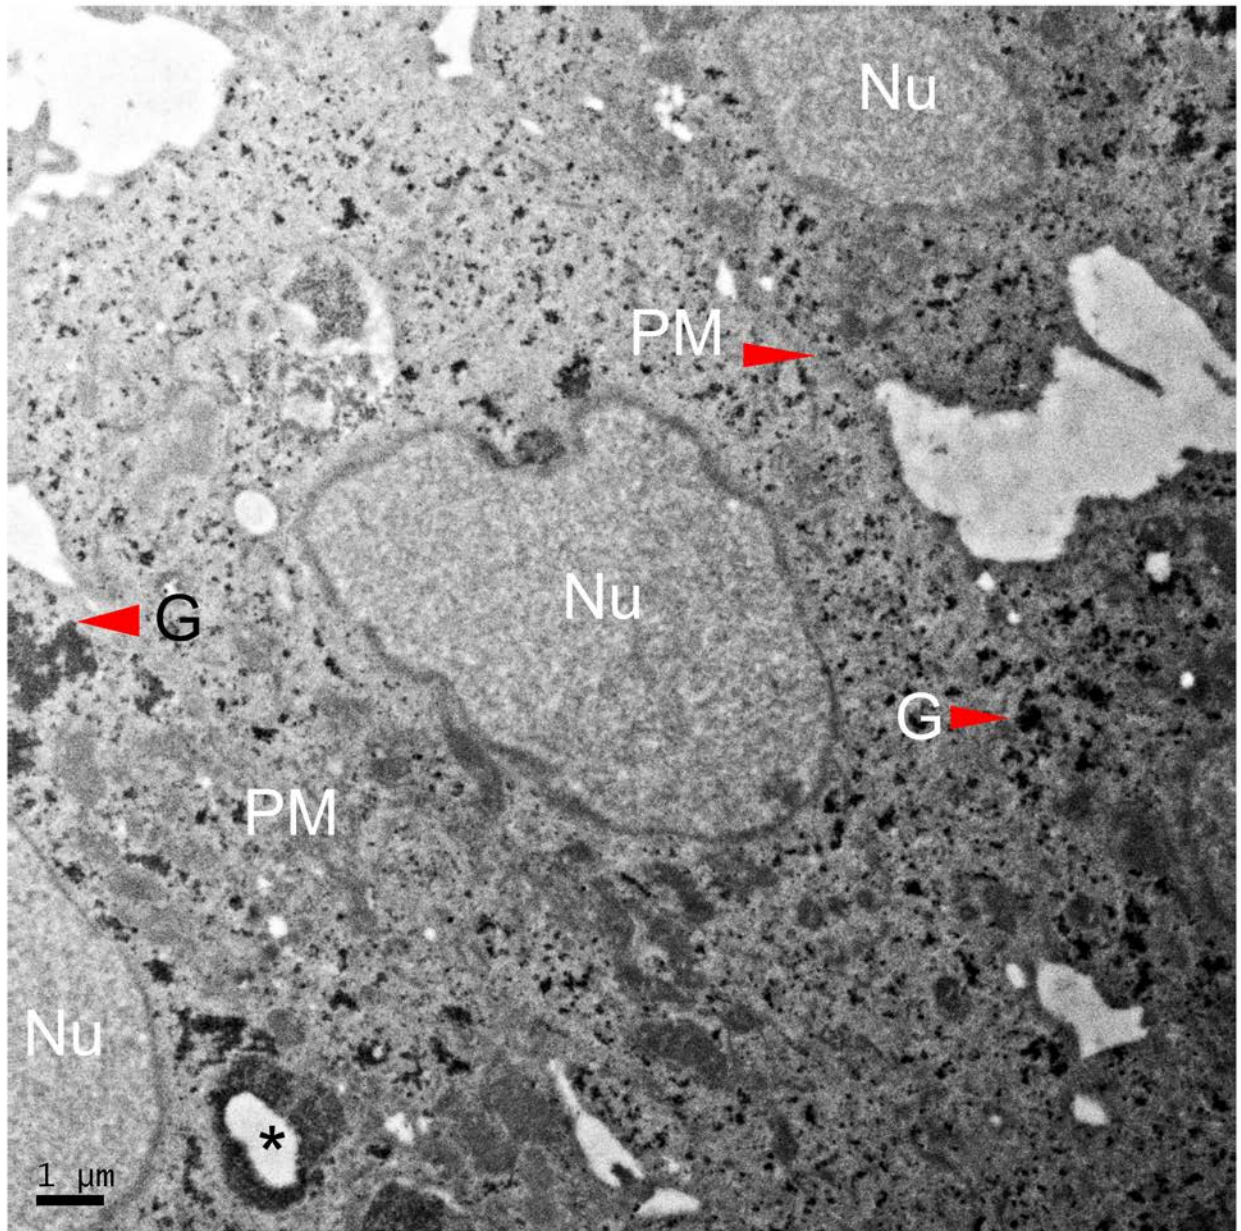

S1 Fig. (B) TEM analysis of glycogen synthesis and the formation of glycogen bodies in untreated H1 hESCs

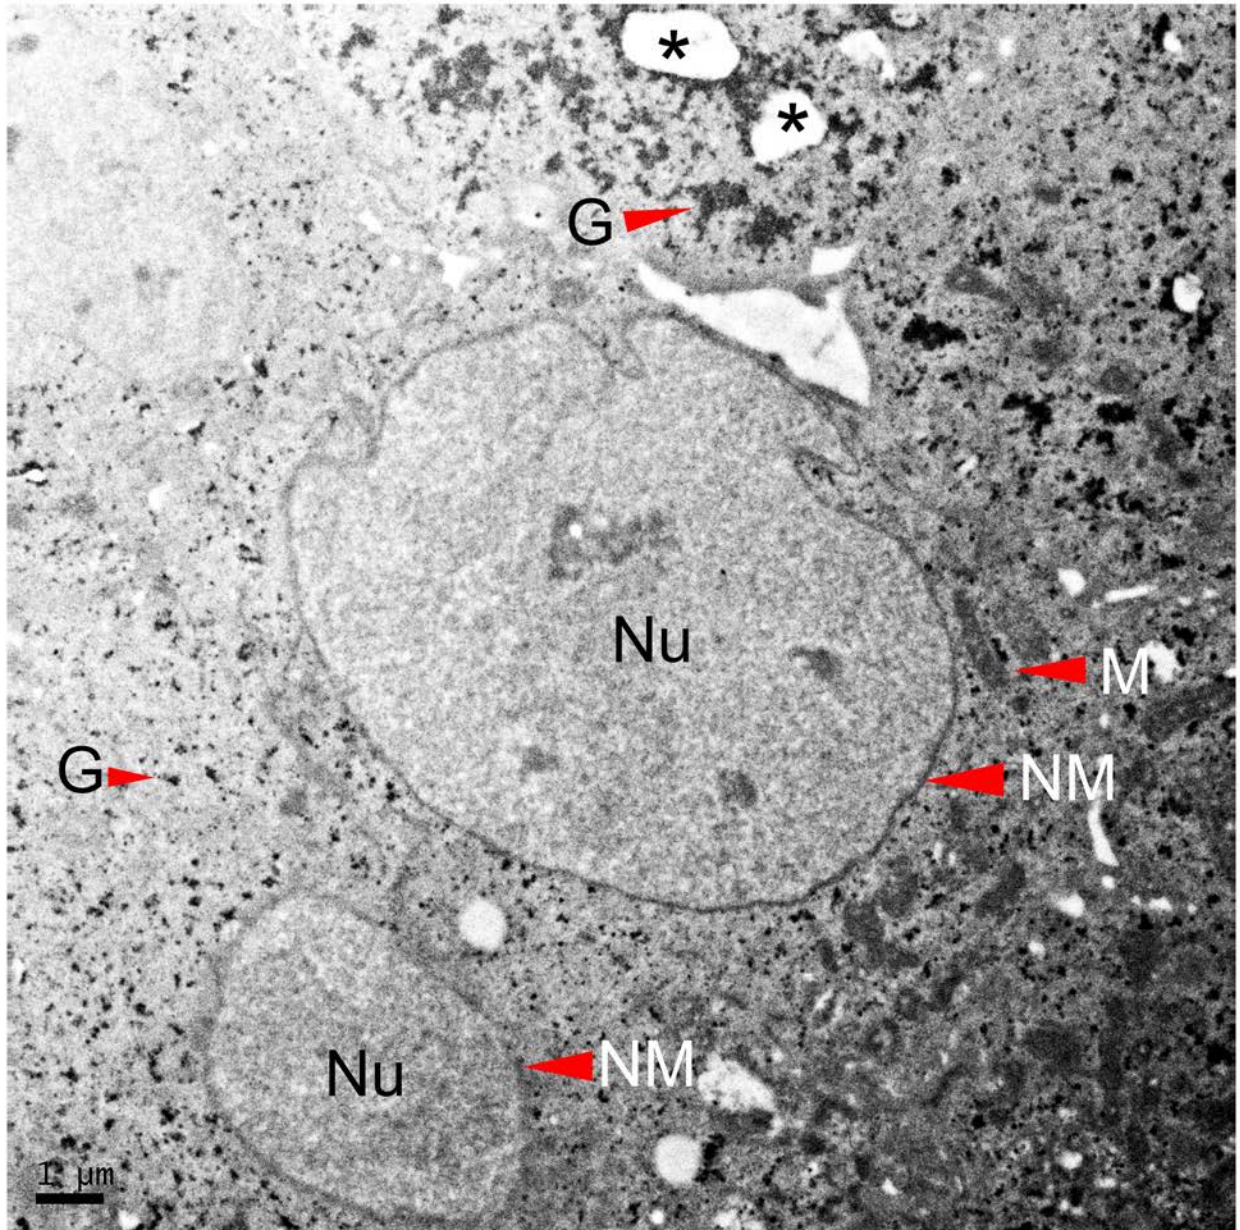

S1 Fig. (C) TEM analysis of glycogen synthesis and the formation of glycogen bodies in untreated H1 hESCs

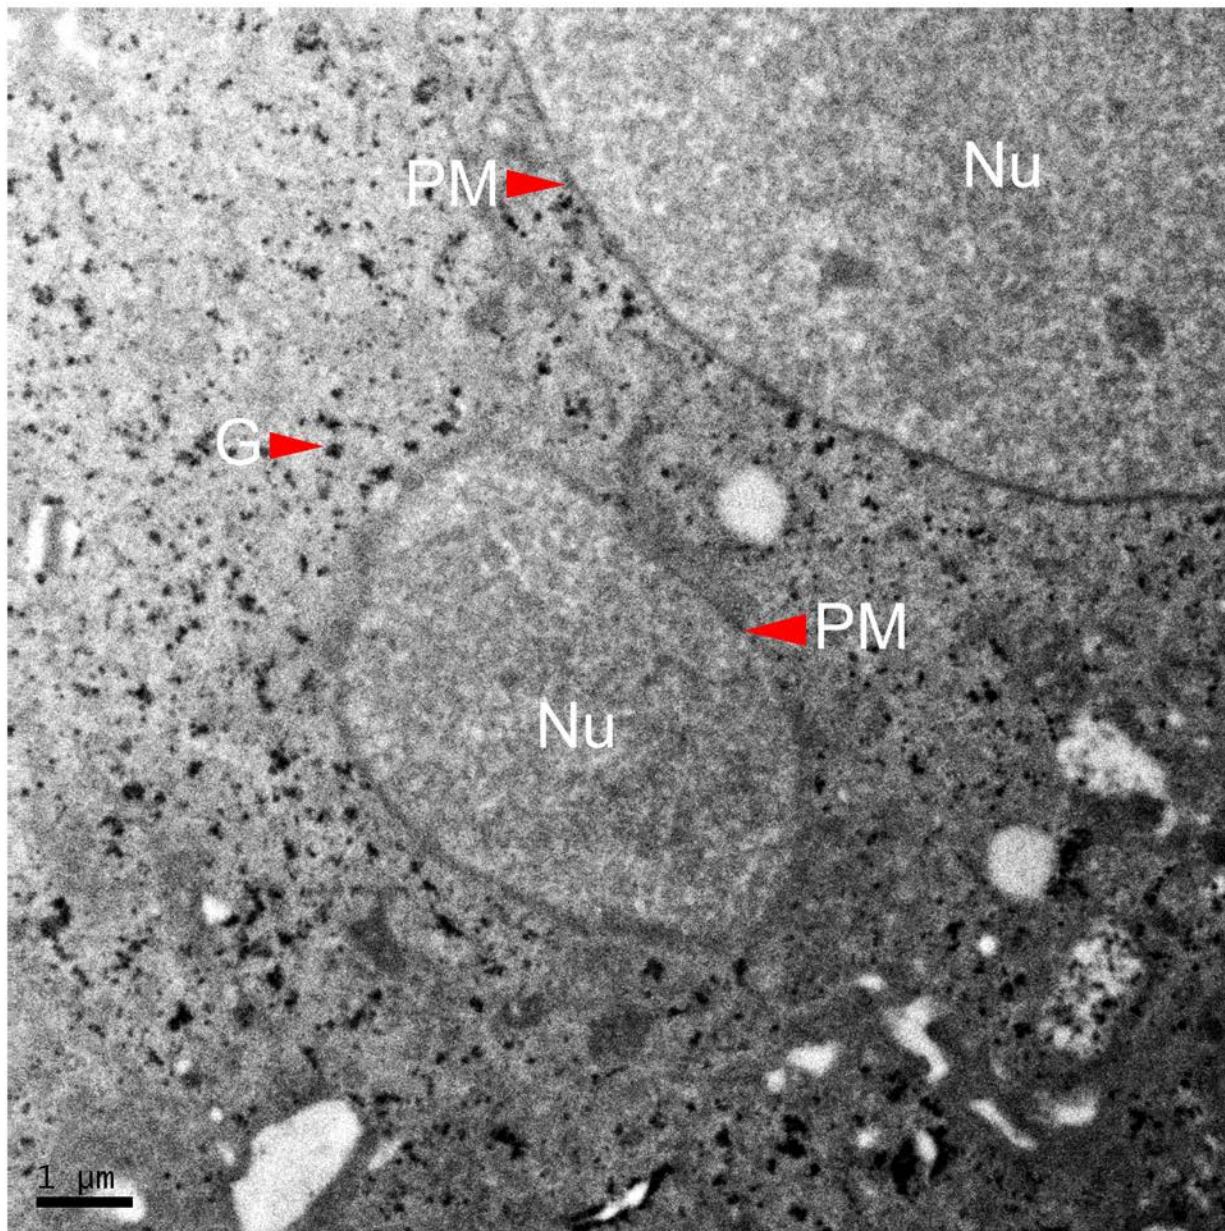

S1 Fig. (D) TEM analysis of glycogen synthesis and the formation of glycogen bodies in untreated H1 hESCs

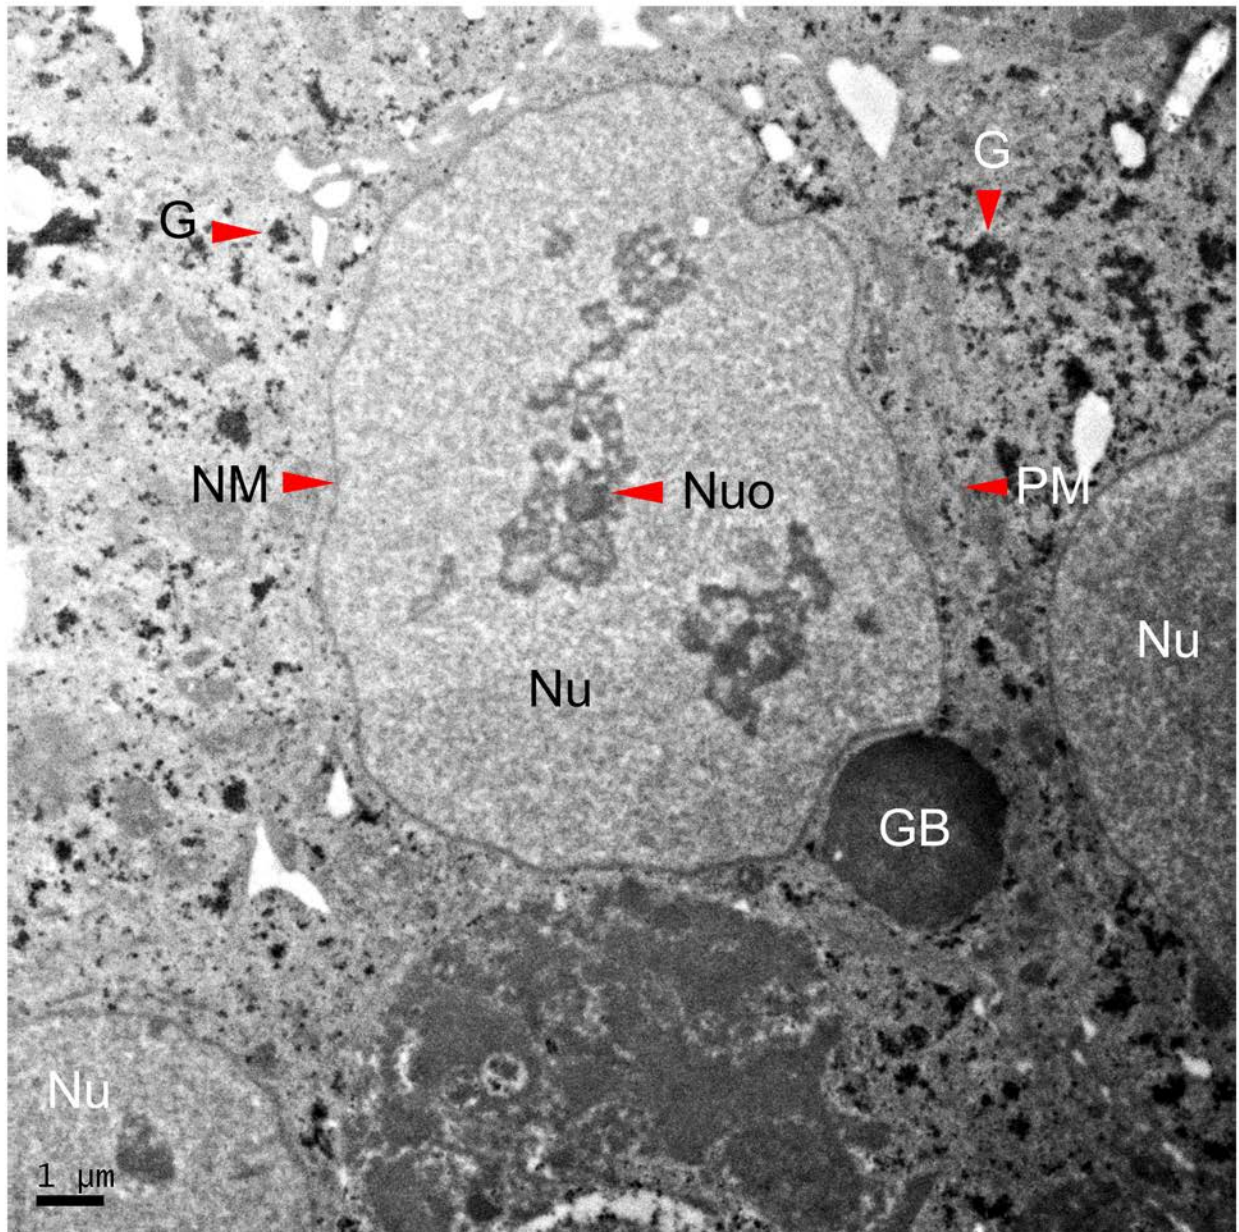

S1 Fig. (E) TEM analysis of glycogen synthesis and the formation of glycogen bodies in untreated H1 hESCs (control)

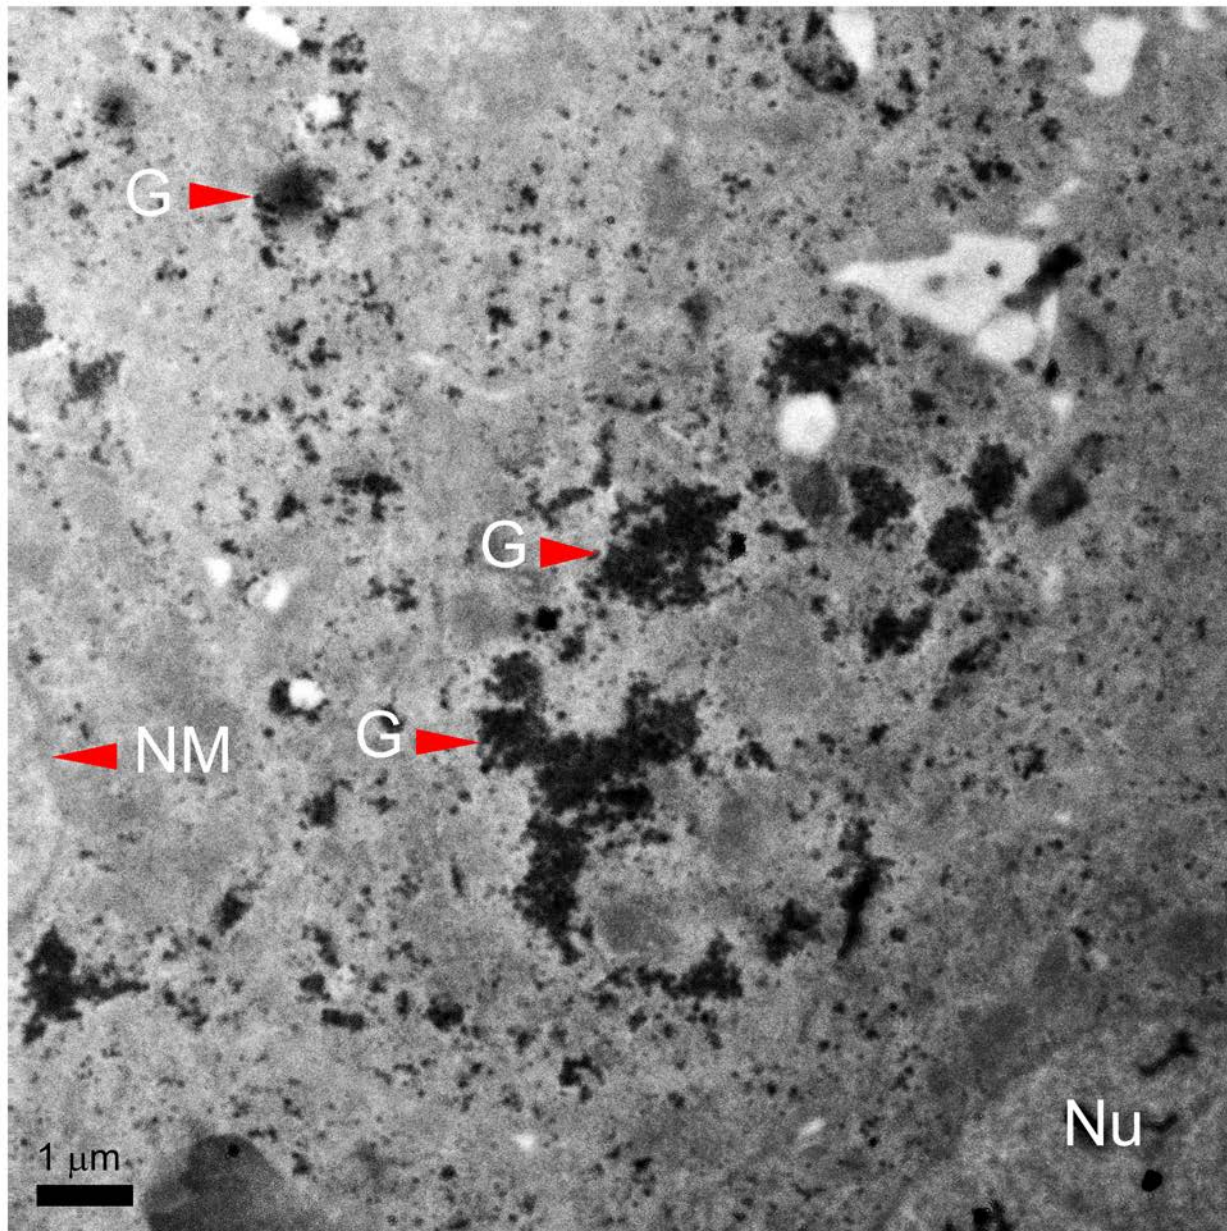

S1 Fig. (F) TEM analysis of glycogen synthesis and the formation of glycogen bodies mediated by GSK-3 inhibition in H1 hESCs

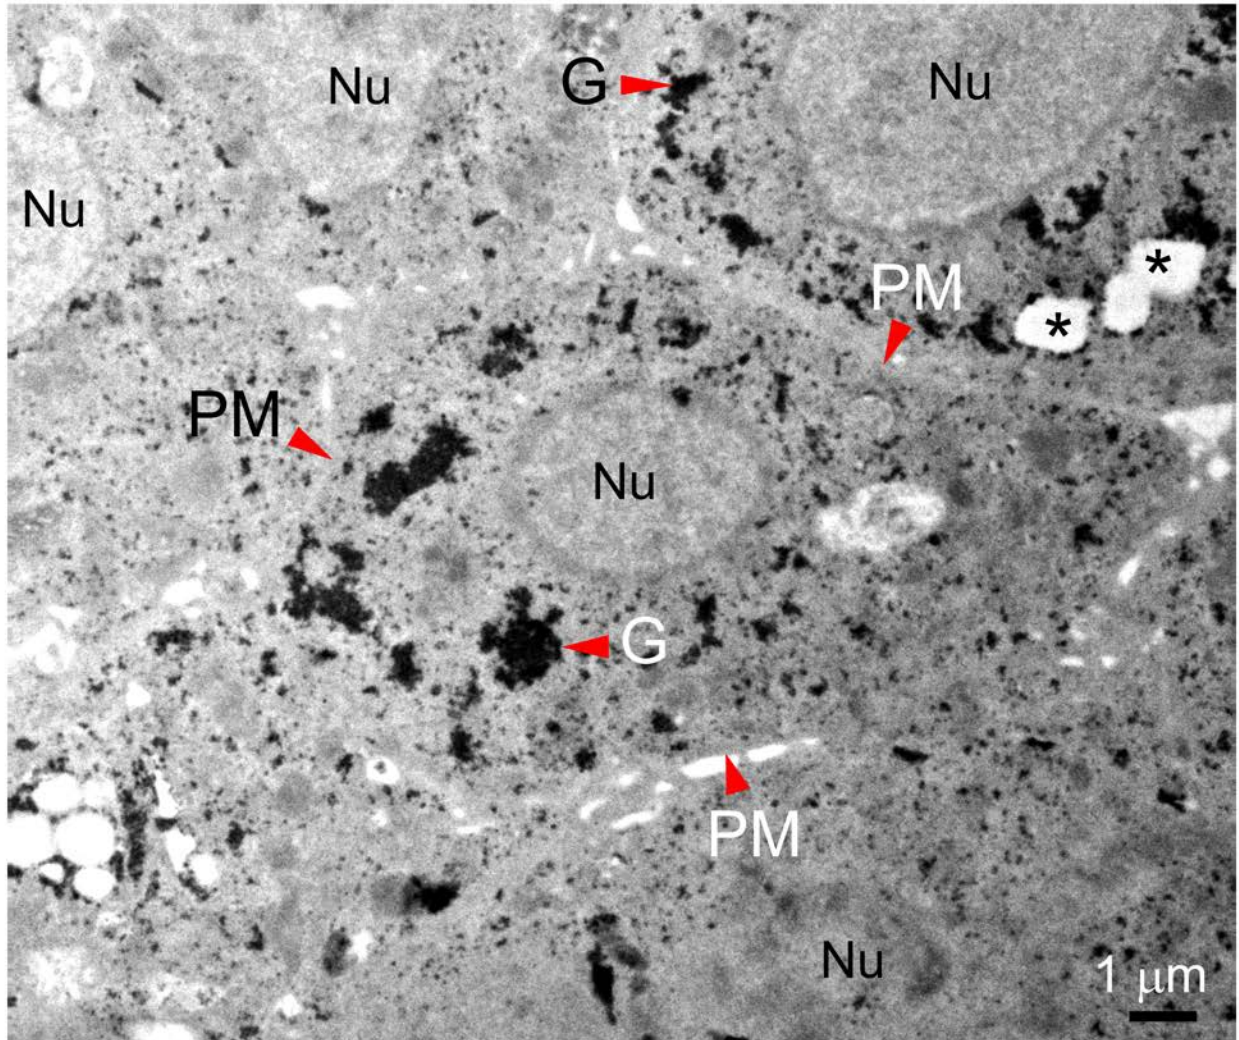

S1 Fig. (G) TEM analysis of glycogen synthesis and the formation of glycogen bodies mediated by GSK-3 inhibition in H1 hESCs.

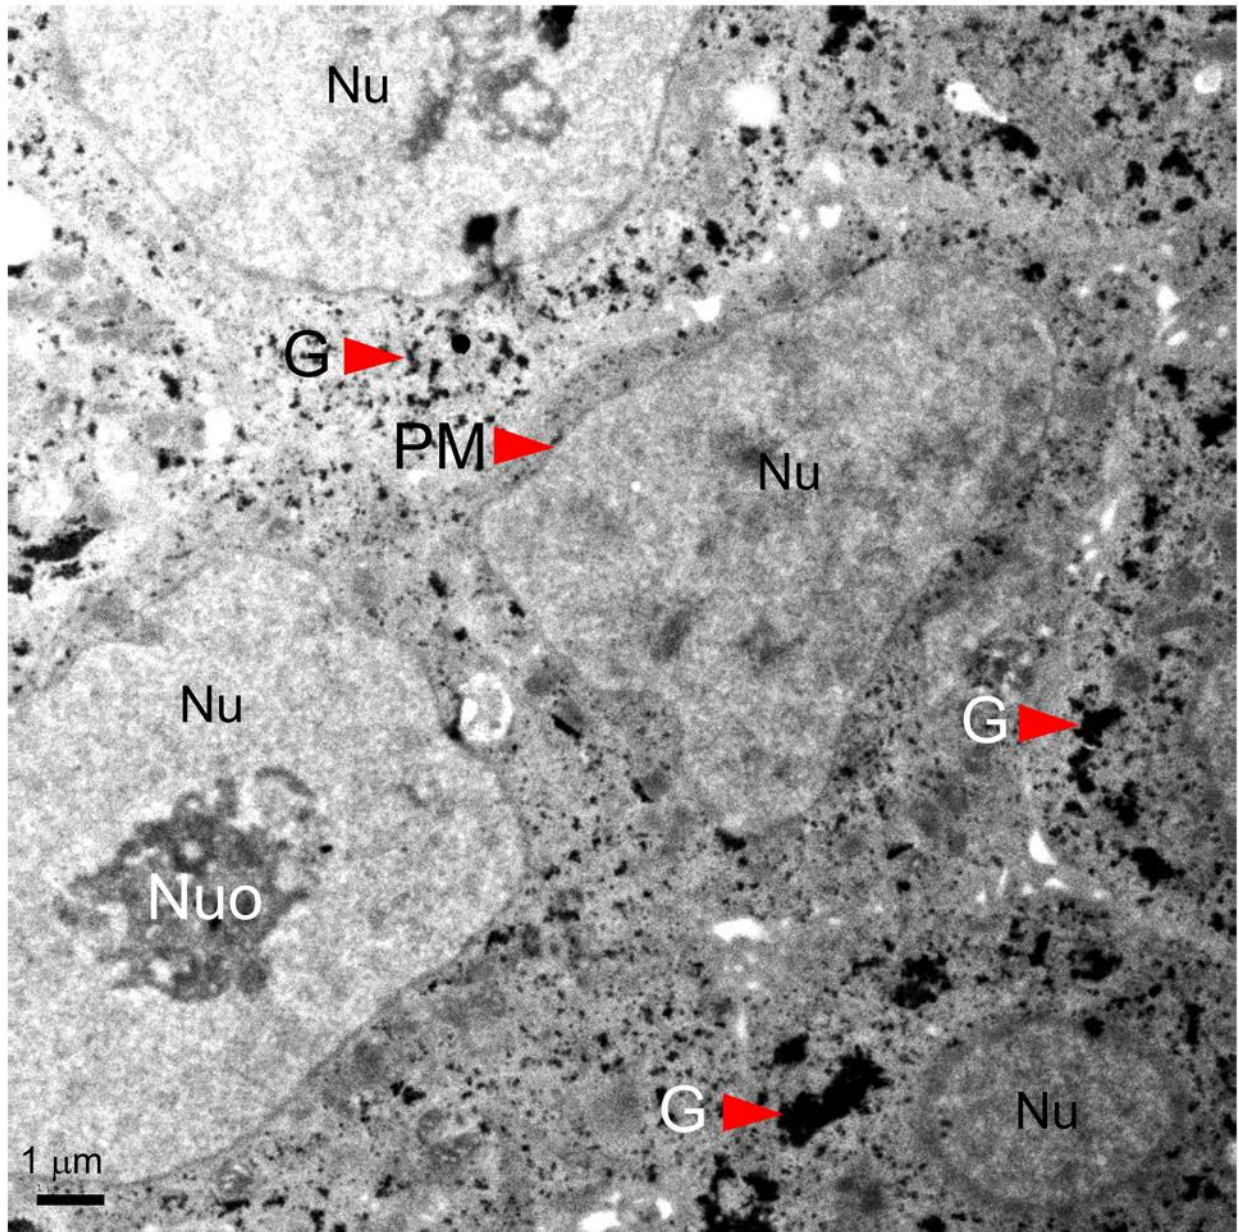

S1 Fig. (H) TEM analysis of glycogen synthesis and the formation of glycogen bodies mediated by GSK-3 inhibition in H1 hESCs.



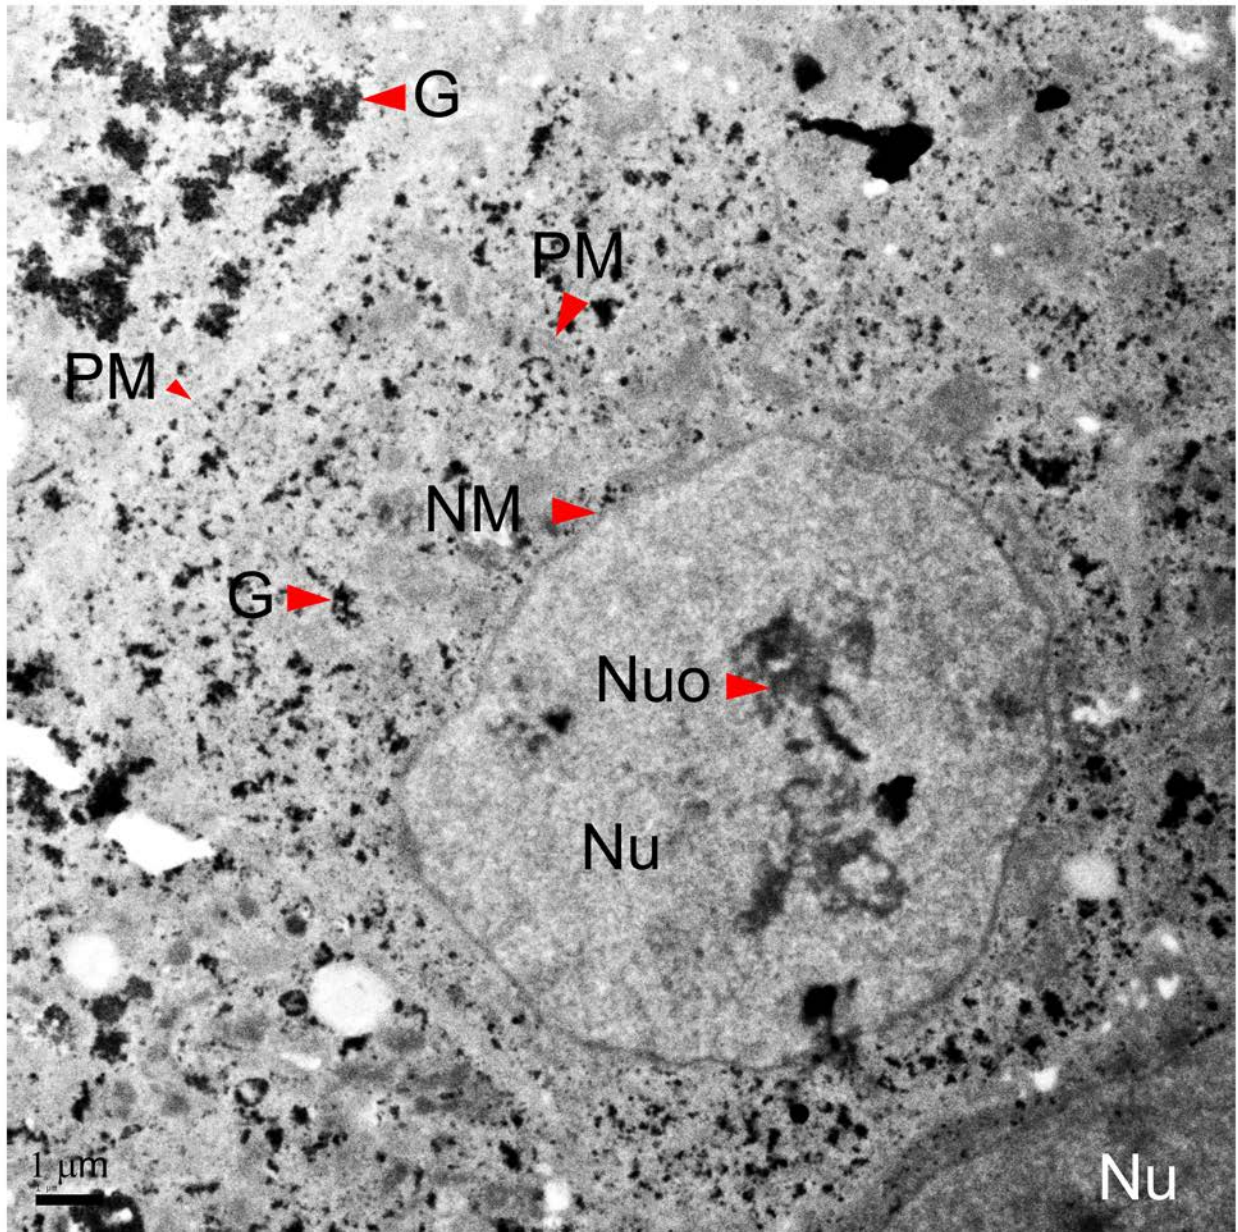

S1 Fig. (I) TEM analysis of glycogen synthesis and the formation of glycogen bodies mediated by GSK-3 inhibition in H1 hESCs.
